# Supplementary material
Source: PubMed Central journal article supplement (PMC2682902)
Supplement: M808472200_1.pdf [file M808472200_1.pdf]

Supplemental Figure 1

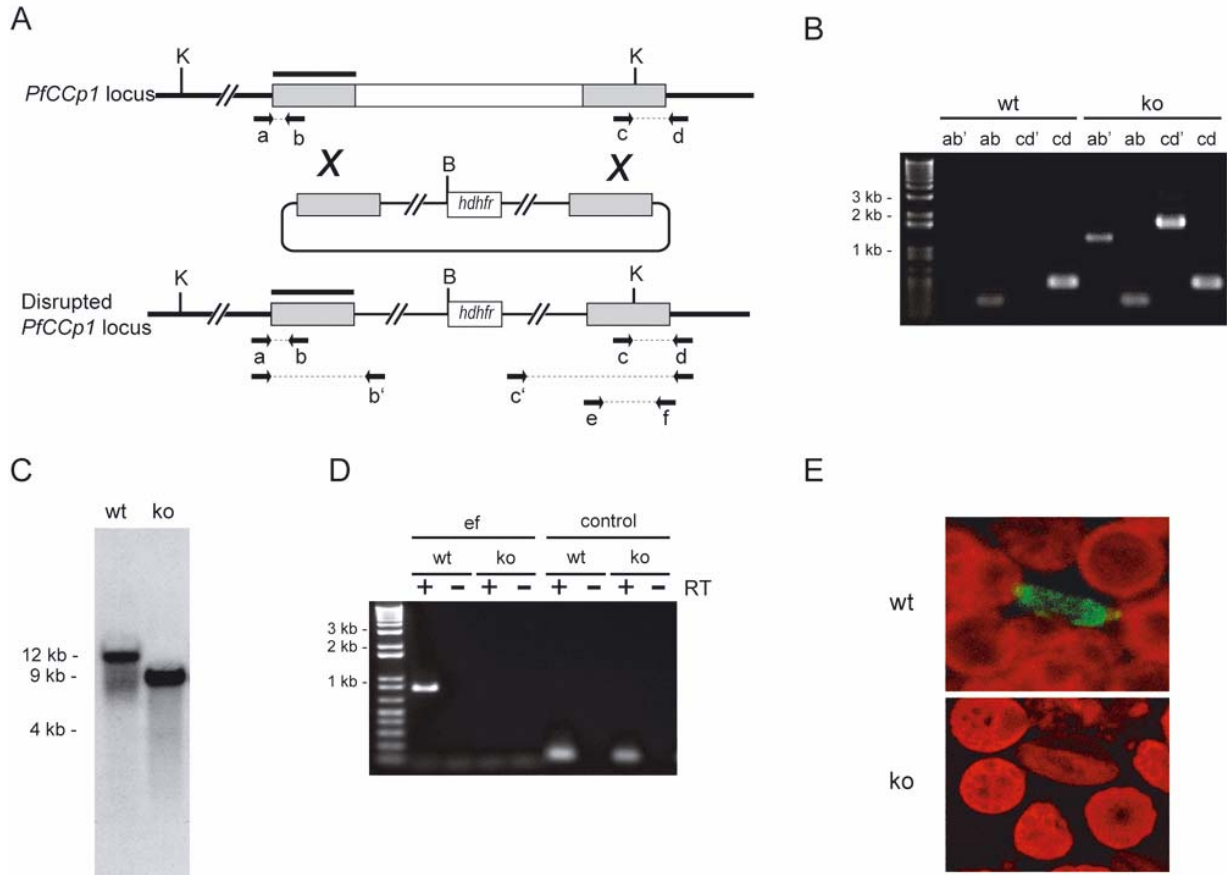

**Supplemental Fig. 1.** Targeted gene disruption of *PfCCP1* via double homologous recombination. **A.** Schematic of the *PfCCP1* locus and the locations of PCR primers that yield products diagnostic of wild type and disrupted loci. Not shown is the *thymidine kinase* gene expression cassette that is used to force the second recombination event via negative selection with ganciclovir drug pressure. **B.** Ethidium bromide-stained agarose gel electrophoresis of PCR products diagnostic of integration events, using primer pairs indicated above the respective lanes. **C.** Southern blot of KpnI plus BamHI cut genomic DNA from wild type and gene knockout line showing complete disruption of the *PfCCP1* gene locus. The probe used to screen the Southern blot is indicated in panel A as a solid horizontal bar above the 5' coding region of the *PfCCP1* gene. **D.** RT-PCR of *PfCCP1* transcripts with set of primers "e f" shows loss of expression in knockout clone. Reverse transcriptase and sham controls are indicated above the lanes by "+" and "-", respectively. The housekeeping gene, *arginyl-tRNA synthetase* (PFL0900c), was used as a loading control. **E.** Indirect immunofluorescence assay demonstrated that *PfCCP1* is absent in *PfCCP1*-KO gametocytes. *PfCCP1* was stained with anti-*PfCCP1* mouse antibodies followed by goat anti-mouse secondary antibodies conjugated with Alexa Fluor 488 (green). Erythrocytes were counterstained with Evans Blue (red). wt, wild type *P. falciparum* NF54; ko, *PfCCP1* knockout clone.

Supplemental Figure 2

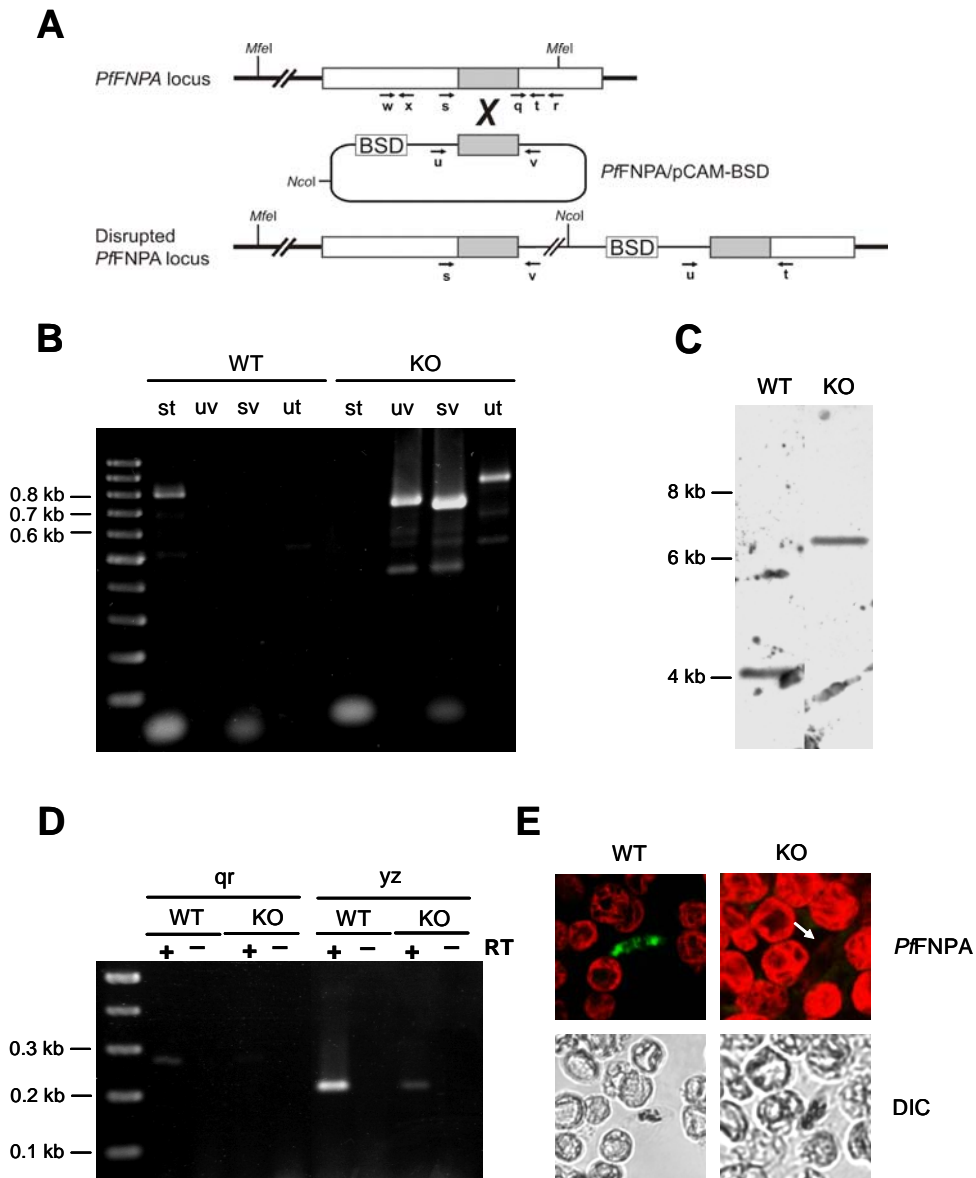

**Supplemental Fig. 2.** Targeted gene disruption of *PffNPA* via single crossover homologous recombination. **A.** Schematic of the *PffNPA* locus and the locations of PCR primers that yield products diagnostic of wild type and disrupted loci as well as oligonucleotides used for Southern blot and RT-PCR. **B.** Ethidium bromide-stained agarose gel electrophoresis of PCR products diagnostic of integration events, using primer pairs indicated above the respective lanes. **C.** Southern blot of *MfeI* plus *NcoI* cut genomic DNA from wild type and gene knockout line showing complete disruption of the *PffNPA* gene locus. The probe used to screen the Southern blot was generated with oligonucleotides indicated in panel A as “w” and “x”. **D.** RT-PCR of *PffNPA* transcripts with set of primers “q r” shows decreased transcript for the disrupted gene: low transcript expression is due to unspecific promoter activity of the integrated pCAM-BSD vector. Reverse transcriptase (RT) and sham controls are indicated above the lanes by “+” and “-”, respectively. Primers against *Pf39* were used as a loading control. **E.** Indirect immunofluorescence assay demonstrated that *PffNPA* is absent in *PffNPA*-KO gametocytes. *PffNPA* was stained with anti-*PffNPA* mouse antibodies followed by goat anti-mouse secondary antibodies conjugated with Alexa Fluor 488 (green). Erythrocytes were counterstained with Evans Blue (red). DIC, Differential interference contrast; WT, wild type *P. falciparum* NF54; KO, *PffNPA* knockout clone.

Supplemental Figure 3

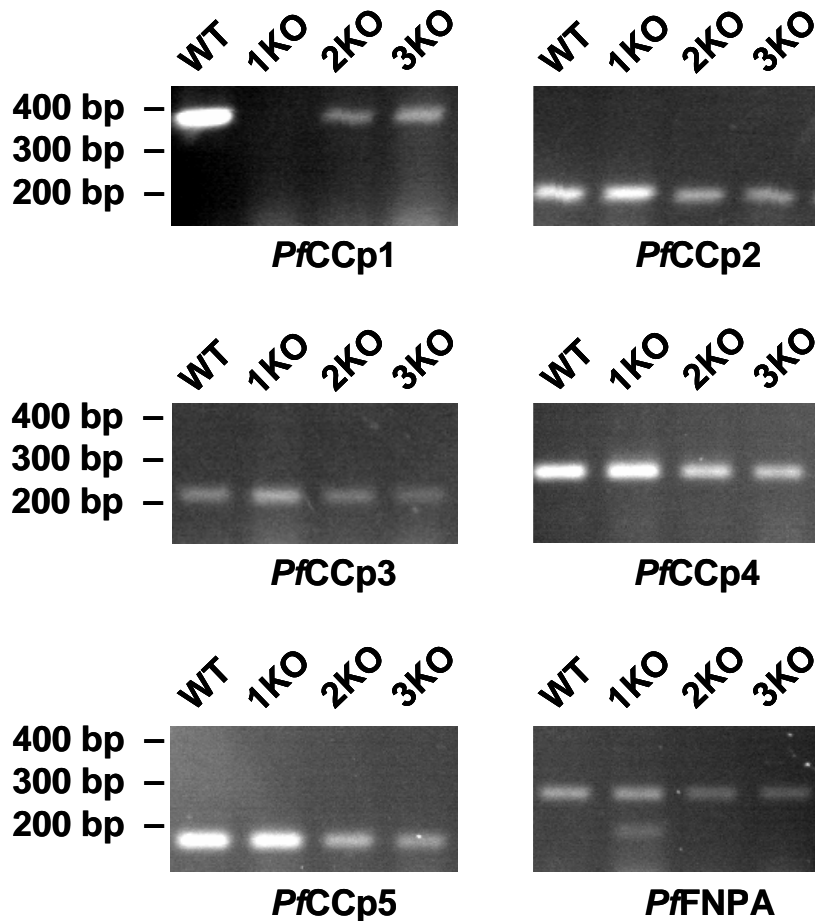

Supplemental Fig. 3. *PfCCp* transcript expression in *PfCCp* gene-disruptant parasites. RT-PCR assay of gene-specific transcript expression using cDNA prepared from gametocytes reveals *PfCCp* transcript in the *PfCCp1*-KO, *PfCCp2*-KO, and *PfCCp3*-KO lines, which are comparable to mRNA levels in the wild type. For *PfCCp2*-KO and *PfCCp3*-KO, transcript is also present for the respective disrupted genes, which might be due to unspecific promoter activity of the integrated pDT-*Tg23* vector. Length of PCR products: *PfCCp1*, 371 bp; *PfCCp2*, 198 bp; *PfCCp3*, 215 bp; *PfCCp4*, 246 bp; *PfCCp5*, 177 bp; *PfFNPA*, 266 bp. 1KO, *PfCCp1*-KO; 2KO, *PfCCp2*-KO; 3KO, *PfCCp3*-KO; WT, wild type.

Supplemental Figure 4

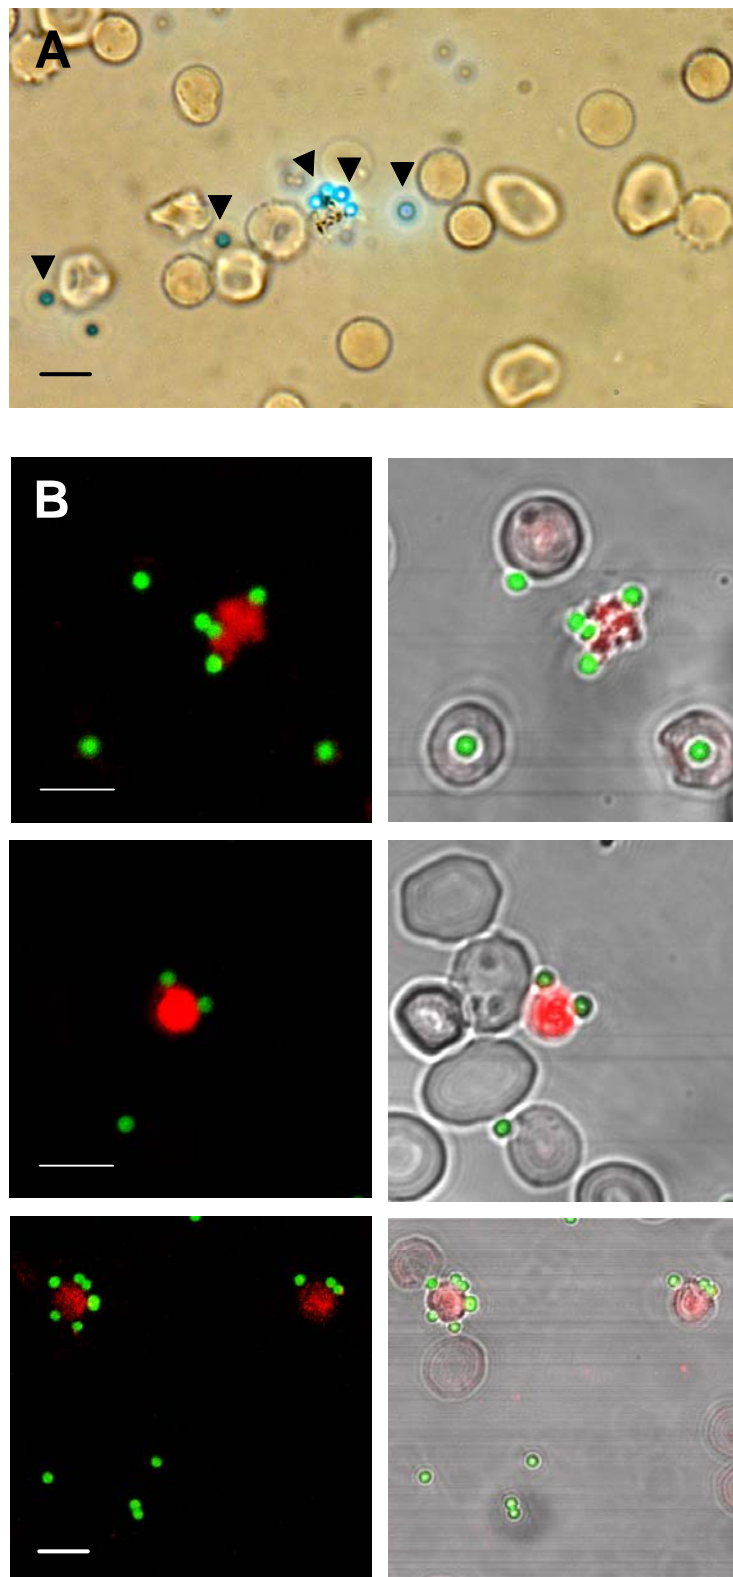

Supplemental Fig. 4. Binding of *PfCCp*-coated latex beads to macrogametes. *A.* Image of fluorescent latex beads coated with the recombinant protein *PfCCp1rp1-6His/SUMO* (arrowheads), which bind to a macrogamete in paraformaldehyde-fixed exflagellating parasite cultures 15 min post-activation. *B.* Binding of latex beads (green) to macrogametes was verified by immunofluorescence assay, using antibodies directed against *Pfs25* (red). Left panel, confocal image; right panel, DIC overlay. Bar, 5  $\mu\text{m}$ .
